# Supplementary material for: The use of a quartz crystal microbalance as an analytical tool to monitor particle/surface and particle/particle interactions under dry ambient and pressurized conditions: a study using common inhaler components
Source: Royal Society of Chemistry journal article supplement (doi:10.1039/c6an01572g), 2016-11-24
Supplement: c6an01572g1.pdf [file c6an01572g1.pdf]

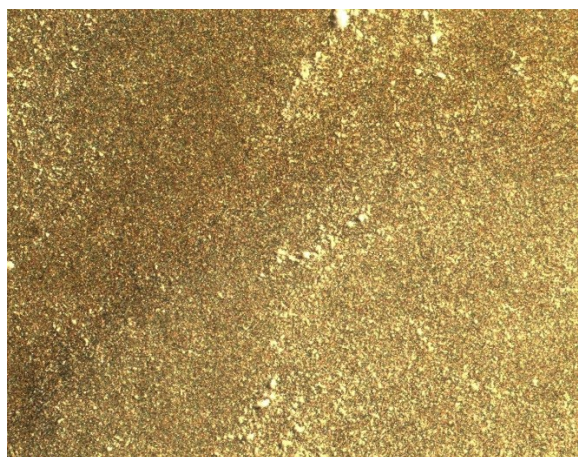

4x magnification

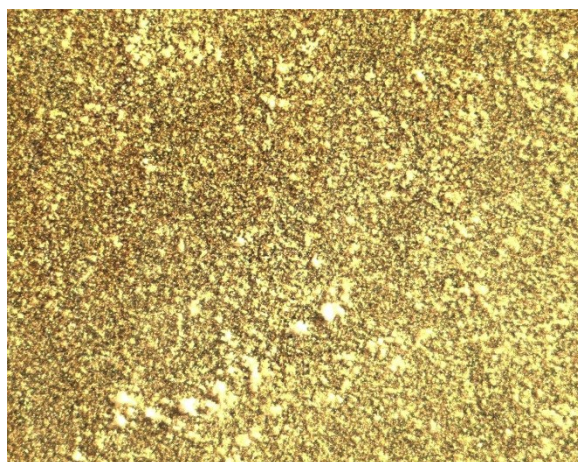

10 x magnification

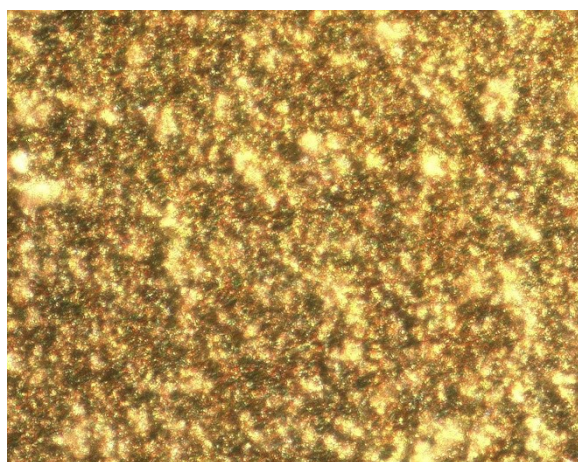

40x magnification

**Figure 1 (Supp):** Representative images of FP particles embedded on PVC layers. Images taken using an Olympus BX41M-LED upright optical microscope.
